# Supplementary material for: Functional redundancy in the nuclear compartmentalization of the late-replicating genome
Source: PubMed Central journal article supplement — Nucleus. 2014 Dec 10;5(6):626–35. doi: 10.4161/19491034.2014.990863 (PMC4615584; doi:10.4161/19491034.2014.990863), 2014-12-10
Supplement: kncl-05-06-990863-s001.pdf [file kncl-05-06-990863-s001.pdf]

**Supplemental Table 1.** Peripheral localization of the early and late replicating regions analyzed in the initial FISH analysis. The BAC probe names are given, their chromosomal locations, average replication timing value (data from replicationdomain.org) and the percentage of alleles localizing to the nuclear periphery.

**Supplemental Table 2.** Localization of select early and late replicating regions with three repressive nuclear subcompartments. The association of 4 late and 2 early replicating regions with peripheral heterochromatin (PH), perinucleolar heterochromatin (PNH) and pericentromeric heterochromatin (PCH) was assessed simultaneously by multicolor 3D ImmunoFISH. Values are the percentages of alleles associating with the given subcompartment. The total repression is the cumulative value of the allele's association with any of the three subcompartments (many alleles contact more than one subcompartment at a time, the total localization to repressive subcompartments is thus not a simple addition of the association with the individual subcompartments).

**Supplemental Table 3.** Localization of select early and late replicating regions with the three repressive nuclear subcompartments on two small non NOR-containing chromosomes. Presentation of data is the same as for Supplemental Table 2.

**Supplemental Table 4.** Repressive nuclear subcompartments exhibit redundancy. The localization of four different late replicating loci on three different chromosomes vis-à-vis the PNH, PCH and PH subcompartments as well as their association to all three subcompartments collectively (total repression) was assessed prior to and after two hours of actinomycin D treatment. Values are the percentages of alleles associating with the given subcompartment. The 'PNH only' column lists what percentage of the test regions associate with only PNH and not another repressive subcompartment at the same time. Localization analysis of regions exhibiting significant PNH association prior to actinomycin D treatment (**A**) and control regions that do not exhibit significant association with PNH to begin with (**B**).

**Supplemental Table 5.** List of all BAC probes and their chromosomal locations used in this study.

**Supplemental Figure 1.** The size of the replication domain affects nuclear localization. Detail of the replication timing profile of chromosome 21 in GM06990 lymphoblastoid cells (adapted from replicationdomain.org, visualized on <http://genome.ucsc.edu>; E = early, L= late replicating regions). The blue (=early) and red (=late) bars above the track indicate the positions of BAC FISH probes used in the analysis. Percentages given above reflect the association of these regions with the nuclear periphery. The two probes within the early replication domains shaded green exhibit a higher association with the nuclear periphery than those in the purple shaded domains, most likely due to the small size of the early domains and since they are nestled in between larger late replicating domains.

**Supplemental Figure 2.** Genome association with the nuclear lamina in human lymphoblastoid cells by DamID. Maps of LaminB1 interactions with all human chromosomes (orange = enrichment, blue = depletion), above their respective replication timing profiles (RT, E = early, L = late). The LADs track in the center shows contiguous segments of prominent lamina association.

**Supplemental Figure 3.** The LaminB1 association of the genome closely follows the replication timing map with few exceptions on large chromosomes. Details of the DamID profiles and replication timing tracks for segments on chromosomes 3 and 1. Shaded areas illustrate discrepancies between the two tracks; they are often smaller late replicating domains within larger segments of the chromosome that does not exhibit significant LaminB1 association.

**Supplemental Figure 4.** Genome association with the nuclear lamina in human lymphoblastoid cells compared to human fibroblasts. DamID maps of LaminB1 interactions with chromosome 3 in the lymphoblastoid cells GM06990 (top track) and the fibroblast Tig3 cell line (bottom track, data from Guelen et al.). The LAD tracks in between depict all LADs in the GM06990 cells, followed by those unique to this tissue, LADs present in both cell types, LADs unique to the fibroblast background, and finally all LADs in the Tig3 fibroblasts. The detail of a 45-50MB segment of the chromosome reveals the similarities and differences between the LADs of the two tissues.

**Supplemental Figure 5.** Multicolor ImmunoFISH to determine the association of genomic loci with three repressive nuclear subcompartments simultaneously. The two rows represent two slices through one GM06990 cell nucleus depicting both alleles of one genomic locus: Detection of the lamina (LaminB1 antibody), nucleoli (nucleolin antibody), pericentromeric heterochromatin (human pancentromeric DNA probe, PCH) and a genomic locus (BAC DNA probe). The last panels show all channels merged – lamina (grey), nucleolin (blue), PCH (red) and BAC DNA (green) channels. The example shown also illustrates how the three repressive subcompartments can be adjacent to each other and even overlap. Moreover, one of the two alleles (bottom row) localizes to both PCH and PNH.

**Supplemental Figure 6.** Association of early and late replicating loci on two small non NOR-containing chromosomes (Chr19, 20) with the three repressive nuclear subcompartments. The localization of several loci was determined simultaneously vis-à-vis the nuclear periphery (PH = peripheral heterochromatin), pericentromeric heterochromatin (PCH) and perinucleolar heterochromatin (PNH) by multicolor ImmunoFISH. Association of the loci to any of the three repressive subcompartments collectively (black) is significantly higher than association only with the PH subcompartment (blue). BAC probe identities: Chr19 A=RP11-451E20, B=RP11-206D24, C=RP11-69B20, Chr20 A=RP11-273F19, B=RP11-359H4, C=RP11-1008E7, D=RP11-709F1.

**Supplemental Figure 7.** Actinomycin D treatment of GM06990 cells does not abrogate RNA polymerase II activity. Cells were pulse labeled with EU prior and following actinomycin D treatment. The EU incorporation was visualized by the Click-It reaction (Life Technologies). Left panel shows GM06990 cells prior to any actinomycin D treatment, prominent rRNA synthesis is visible within the nucleoli and mRNA synthesis in the remaining nucleoplasm. Right panel shows GM06990 cells following actinomycin D treatment; while rRNA synthesis has been abrogated by RNA polymerase I inhibition, mRNA synthesis by RNA polymerase II continues within the remainder of the nucleoplasm.

**Supplemental Figure 8.** Actinomycin D treatment of GM06990 cells does not substantially alter expression levels of annotated open reading frames (ORFs) in test regions. qPCR on nuclear RNA isolated prior to and following 2hrs of actinomycin D treatment. Expression levels were assayed of all ORFs located in the regions tested in the localization analysis, shown are only results and primer pairs for ORFs yielding reliably detectable qPCR signal. Exon/intron primer pairs were selected to assay specifically for nascent transcripts, exon/exon primer pairs to control for genomic DNA contamination. The graph shows Ct values of averages of three independent PCR reactions performed in triplicate ( $\pm$  SD), all normalized with GAPDH, which remained invariant with treatment. We aimed to ensure that the actinomycin D treatment would not lead to aberrant increased expression that might affect the localization of the genomic segment. No increase in expression was observed, and only in one case a slight decrease (PITNB).

## Supplemental Table 1

|             | <b>Chr</b> | <b>Position</b> | <b>RT value</b> | <b>% Peripheral</b> |
|-------------|------------|-----------------|-----------------|---------------------|
| RP11-119L4  | 3          | 2.74            | -0.21           | 93.7                |
| RP11-708D1  | 3          | 14.75           | 0.85            | 24.3                |
| RP11-17C24  | 3          | 21.58           | -0.86           | 94.3                |
| RP11-107O1  | 3          | 189.07          | 1.02            | 62.2                |
| RP11-492I23 | 4          | 3.43            | 1.07            | 20.9                |
| RP11-362J17 | 4          | 20.83           | -0.82           | 76.9                |
| RP11-213G21 | 4          | 38.59           | 1.09            | 32.9                |
| RP11-423P14 | 4          | 66.18           | -0.65           | 87.7                |
| RP11-69O1   | 4          | 141.47          | -0.26           | 70.3                |
| RP11-228F3  | 4          | 185.72          | 1.18            | 37.3                |
| RP11-68M15  | 14         | 23.56           | 1.15            | 9.5                 |
| RP11-91J1   | 14         | 46.29           | -0.80           | 54.6                |
| RP11-79B13  | 14         | 68.75           | 0.77            | 7.1                 |
| RP11-88N20  | 14         | 87.63           | -0.98           | 73.0                |
| RP11-42M14  | 17         | 50.70           | -0.98           | 47.3                |
| RP11-142B17 | 17         | 56.75           | 1.14            | 7.6                 |
| RP11-243E20 | 17         | 68.62           | -0.75           | 59.8                |
| RP11-800K7  | 21         | 24.59           | -0.88           | 53.4                |
| RP11-705P12 | 21         | 26.80           | 0.70            | 28.9                |
| CTD-2207L7  | 21         | 28.75           | -1.07           | 54.5                |
| RP11-385G3  | 21         | 30.43           | 0.99            | 29.9                |
| RP11-315H16 | 21         | 31.81           | -0.95           | 47.3                |
| CTD-2059E17 | 21         | 34.73           | 0.97            | 13.0                |
| RP11-105O24 | 21         | 38.87           | 0.84            | 8.8                 |
| RP11-771K8  | 21         | 42.20           | -0.92           | 29.1                |
| RP11-22M5   | 22         | 22.32           | 1.14            | 2.9                 |
| RP11-79G21  | 22         | 28.25           | -0.26           | 15.6                |
| RP11-49M22  | 22         | 45.17           | 0.41            | 3.9                 |
| RP11-66M5   | 22         | 48.36           | -0.59           | 14.6                |

## Supplemental Table 2

|              | <b>BAC</b>  | <b>Chr</b> | <b>RT</b> | <b>PH</b> | <b>PNH</b> | <b>PCH</b> | <b>Repressive</b> |
|--------------|-------------|------------|-----------|-----------|------------|------------|-------------------|
| <b>Late</b>  | RP11-42M14  | 17         | -0.98     | 48.60     | 33.21      | 43.90      | 87.80             |
|              | CTD-2207L7  | 21         | -1.07     | 48.05     | 63.02      | 45.01      | 96.84             |
|              | RP11-315H16 | 21         | -0.95     | 48.44     | 63.63      | 44.52      | 96.07             |
|              | RP11-79G21  | 22         | -0.26     | 24.14     | 45.61      | 31.03      | 73.06             |
|              |             |            |           |           |            |            |                   |
| <b>Early</b> | RP11-142B17 | 17         | 1.14      | 10.91     | 7.62       | 5.30       | 23.40             |
|              | CTD-2059E17 | 21         | 0.97      | 20.51     | 34.89      | 13.50      | 50.00             |

### Supplemental Table 3

|              | <b>BAC</b>  | <b>Chr</b> | <b>RT</b> | <b>PH</b> | <b>PNH</b> | <b>PCH</b> | <b>Repressive</b> |
|--------------|-------------|------------|-----------|-----------|------------|------------|-------------------|
| <b>Late</b>  | RP11-206D24 | 19         | -0.52     | 13.84     | 27.66      | 41.30      | 67.40             |
|              | RP11-69B20  | 19         | -0.80     | 19.66     | 31.08      | 46.70      | 73.90             |
|              | RP11-1008E7 | 20         | -0.97     | 53.54     | 19.48      | 32.26      | 78.49             |
|              | RP11-709F1  | 20         | -1.08     | 45.10     | 36.85      | 58.88      | 93.66             |
|              |             |            |           |           |            |            |                   |
| <b>Early</b> | RP11-451E20 | 19         | 1.13      | 8.74      | 17.92      | 11.03      | 32.40             |
|              | RP11-273F19 | 20         | 0.97      | 30.07     | 13.54      | 18.79      | 55.76             |
|              | RP11-359H4  | 20         | 1.20      | 15.43     | 9.34       | 19.05      | 40.48             |

## Supplemental Table 4

### A

|                |        | PH    | PCH   | PNH   | PNH only | total Repression |
|----------------|--------|-------|-------|-------|----------|------------------|
| <b>Chr20</b>   | Ctrl   | 44.94 | 56.96 | 36.08 | 15.19    | 91.77            |
| (RP11-709F1)   | Actino | 55.33 | 58.38 | 11.68 | 2.54     | 87.31            |
| <b>Chr21 A</b> | Ctrl   | 47.80 | 41.51 | 68.55 | 22.64    | 94.97            |
| (RP11-315H16)  | Actino | 59.77 | 45.98 | 18.97 | 2.87     | 87.93            |
| <b>Chr21 B</b> | Ctrl   | 48.70 | 43.04 | 66.52 | 21.74    | 96.52            |
| (CTD-2207L7)   | Actino | 59.45 | 41.55 | 9.14  | 2.74     | 82.96            |
| <b>Chr22</b>   | Ctrl   | 26.94 | 31.00 | 49.08 | 26.81    | 73.06            |
| (RP11-79G21)   | Actino | 36.73 | 34.91 | 13.45 | 3.09     | 64.00            |

### B

|               |        | PH    | PCH   | PNH   | PNH only | total Repression |
|---------------|--------|-------|-------|-------|----------|------------------|
| <b>Chr3 A</b> | Ctrl   | 41.69 | 6.09  | 8.67  | 4.45     | 50.82            |
| (RP11-708D1)  | Actino | 40.17 | 6.07  | 4.60  | 2.51     | 45.82            |
| <b>Chr3 B</b> | Ctrl   | 95.30 | 10.07 | 6.04  | 2.01     | 99.33            |
| (RP11-17C24)  | Actino | 96.15 | 5.77  | 0.00  | 0.00     | 96.15            |
| <b>Chr17</b>  | Ctrl   | 24.60 | 12.70 | 18.25 | 10.32    | 43.65            |
| (RP11-142B17) | Actino | 23.77 | 11.48 | 3.28  | 1.64     | 32.79            |

## Supplemental Table 5

List of all BACs used in  
this study

| <b>BAC</b>  | <b>Chr</b> | <b>Pos. start</b> | <b>Pos. end</b> |
|-------------|------------|-------------------|-----------------|
| RP11-119L4  | chr3       | 2653216           | 2820466         |
| RP11-708D1  | chr3       | 14676541          | 14828209        |
| RP11-17C24  | chr3       | 21501635          | 21662360        |
| RP11-107O1  | chr3       | 188990099         | 189149481       |
| RP11-492I23 | chr4       | 3334580           | 3525884         |
| RP11-362J17 | chr4       | 20738801          | 20920843        |
| RP11-213G21 | chr4       | 38499262          | 38681142        |
| RP11-423P14 | chr4       | 66083619          | 66283525        |
| RP11-69O1   | chr4       | 141384114         | 141554828       |
| RP11-228F3  | chr4       | 185635303         | 185803183       |
| RP11-68M15  | chr14      | 23476852          | 23652426        |
| RP11-91J1   | chr14      | 46188441          | 46392714        |
| RP11-79B13  | chr14      | 68674505          | 68835127        |
| RP11-88N20  | chr14      | 87552921          | 87703166        |
| RP11-142B17 | chr17      | 56666964          | 56840758        |
| RP11-90L11  | chr17      | 68470215          | 68632969        |
| RP11-243E20 | chr17      | 68539717          | 68697062        |
| RP11-206D24 | ch19       | 9267502           | 9437626         |
| RP11-451E20 | ch19       | 16397567          | 16563349        |
| RP11-69B20  | ch19       | 53715397          | 53864483        |
| RP11-273F19 | chr20      | 5583318           | 5745127         |
| RP11-1008E7 | chr20      | 8566634           | 8756158         |
| RP11-359H4  | chr20      | 33931910          | 34099003        |
| RP11-709F1  | chr20      | 59252029          | 59427394        |
| RP11-800K7  | chr21      | 24505210          | 24680695        |
| RP11-705P12 | chr21      | 26716253          | 26892398        |
| CTD-2207L7  | chr21      | 28687795          | 28814324        |
| RP11-385G3  | chr21      | 30357341          | 30510899        |
| RP11-315H16 | chr21      | 31712164          | 31908166        |
| CTD-2059E17 | chr21      | 34648731          | 34807381        |
| RP11-105O24 | chr21      | 38795458          | 38951057        |
| RP11-771K8  | chr21      | 42116785          | 42286115        |
| RP11-22M5   | chr22      | 22239869          | 22394983        |
| RP11-79G21  | chr22      | 28169393          | 28327386        |
| RP11-49M22  | chr22      | 45090621          | 45258577        |
| RP11-66M5   | chr22      | 48279484          | 48441934        |



# Supplemental Figure 1

## Chromosome 21

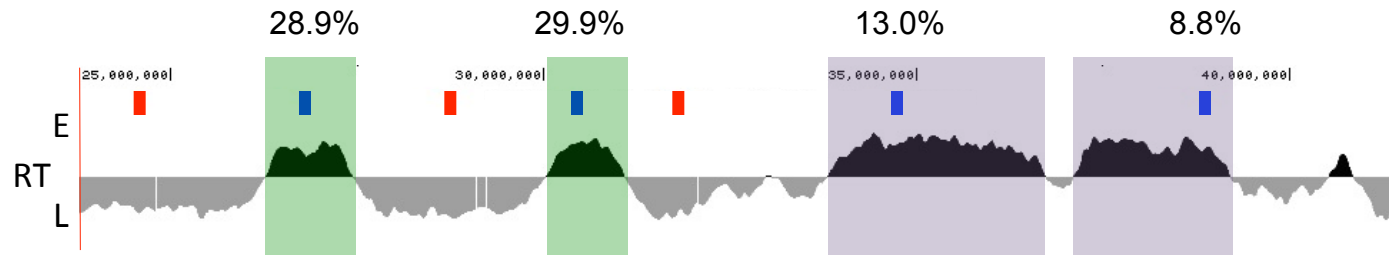

# Supplemental Figure 2

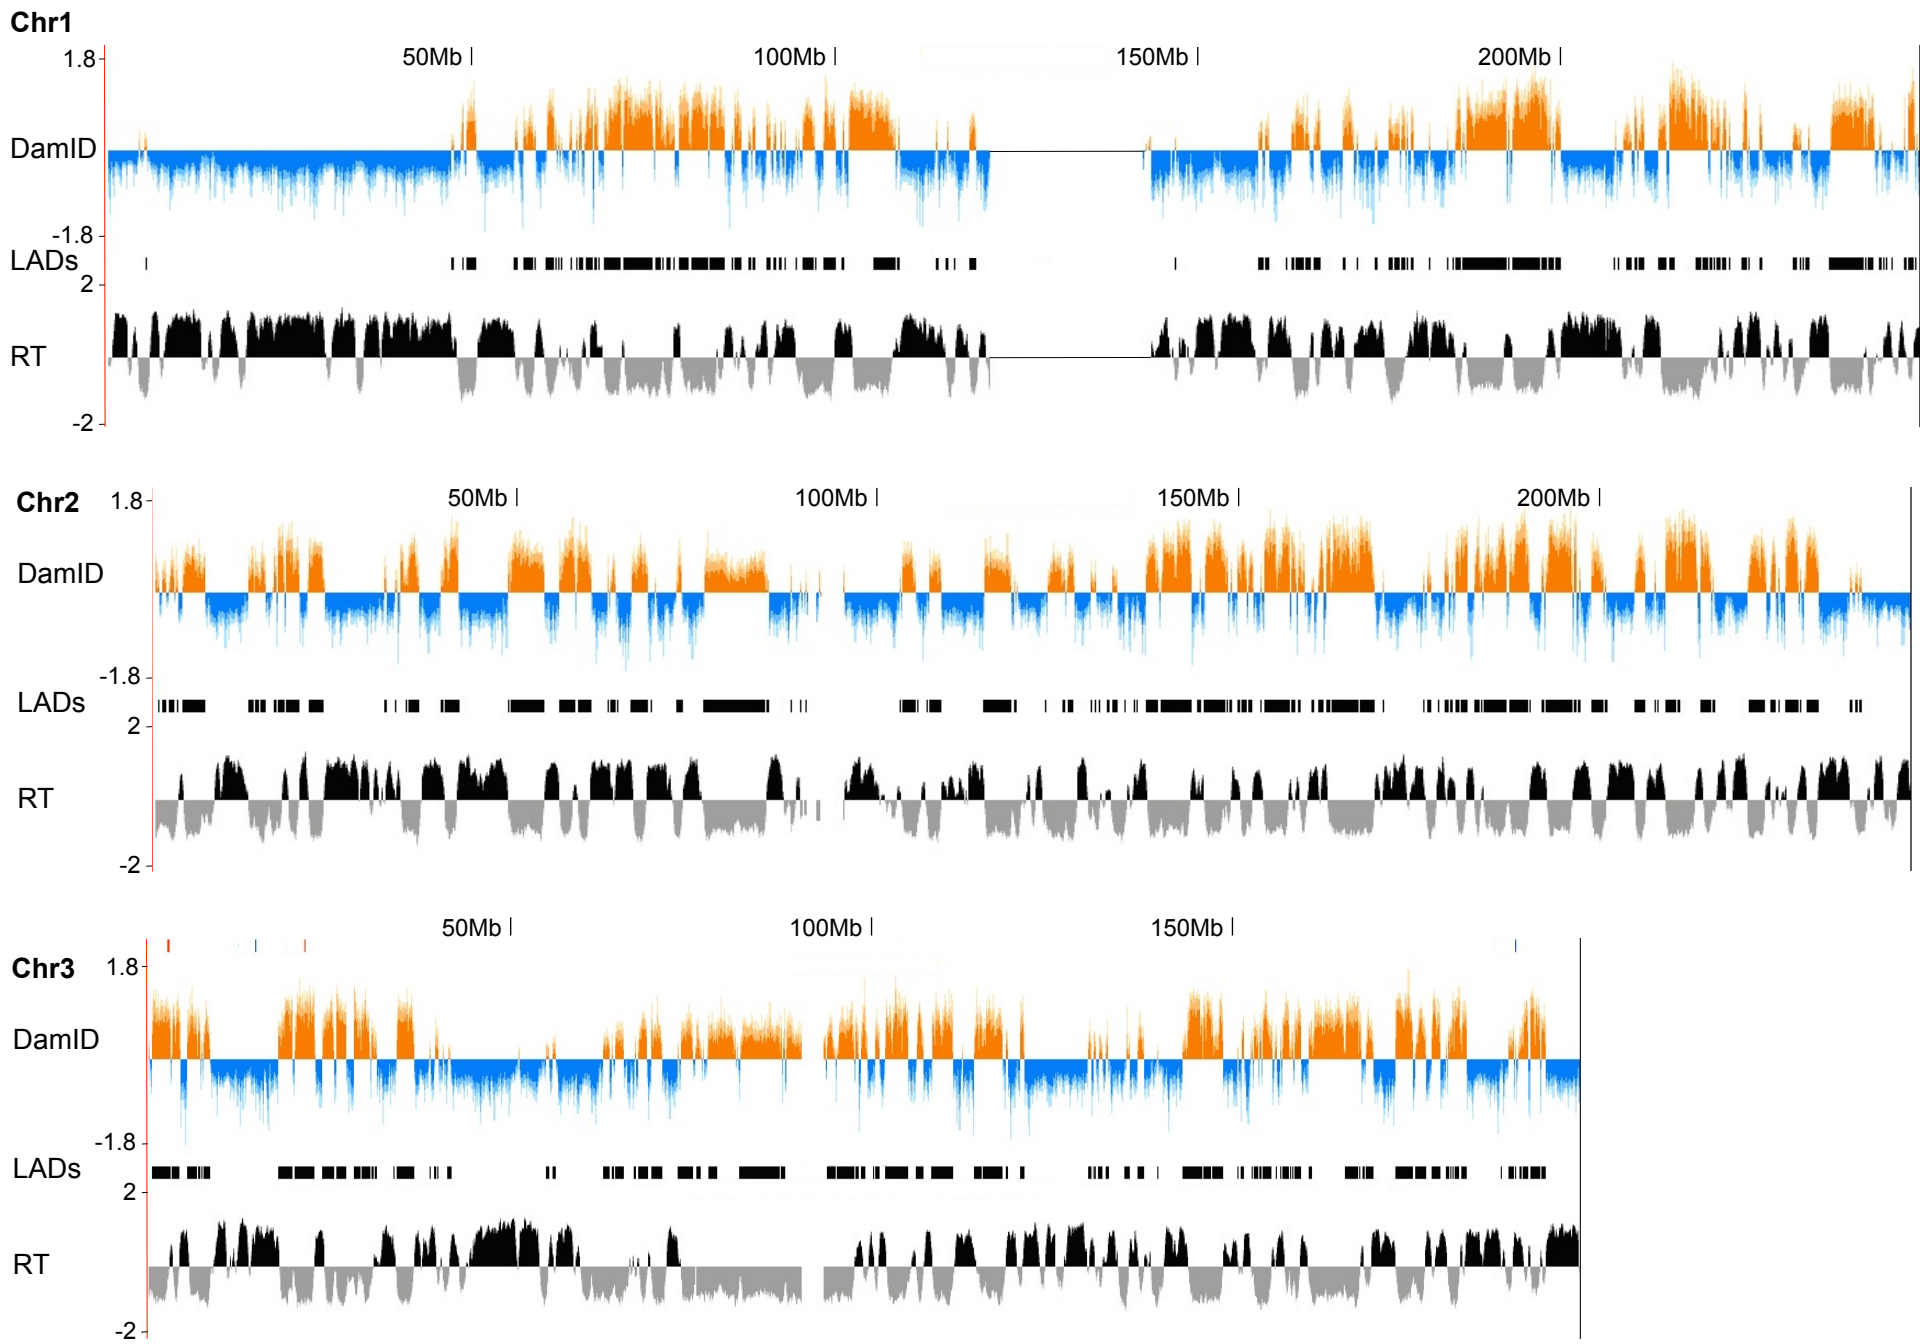

## Supplemental Figure 2

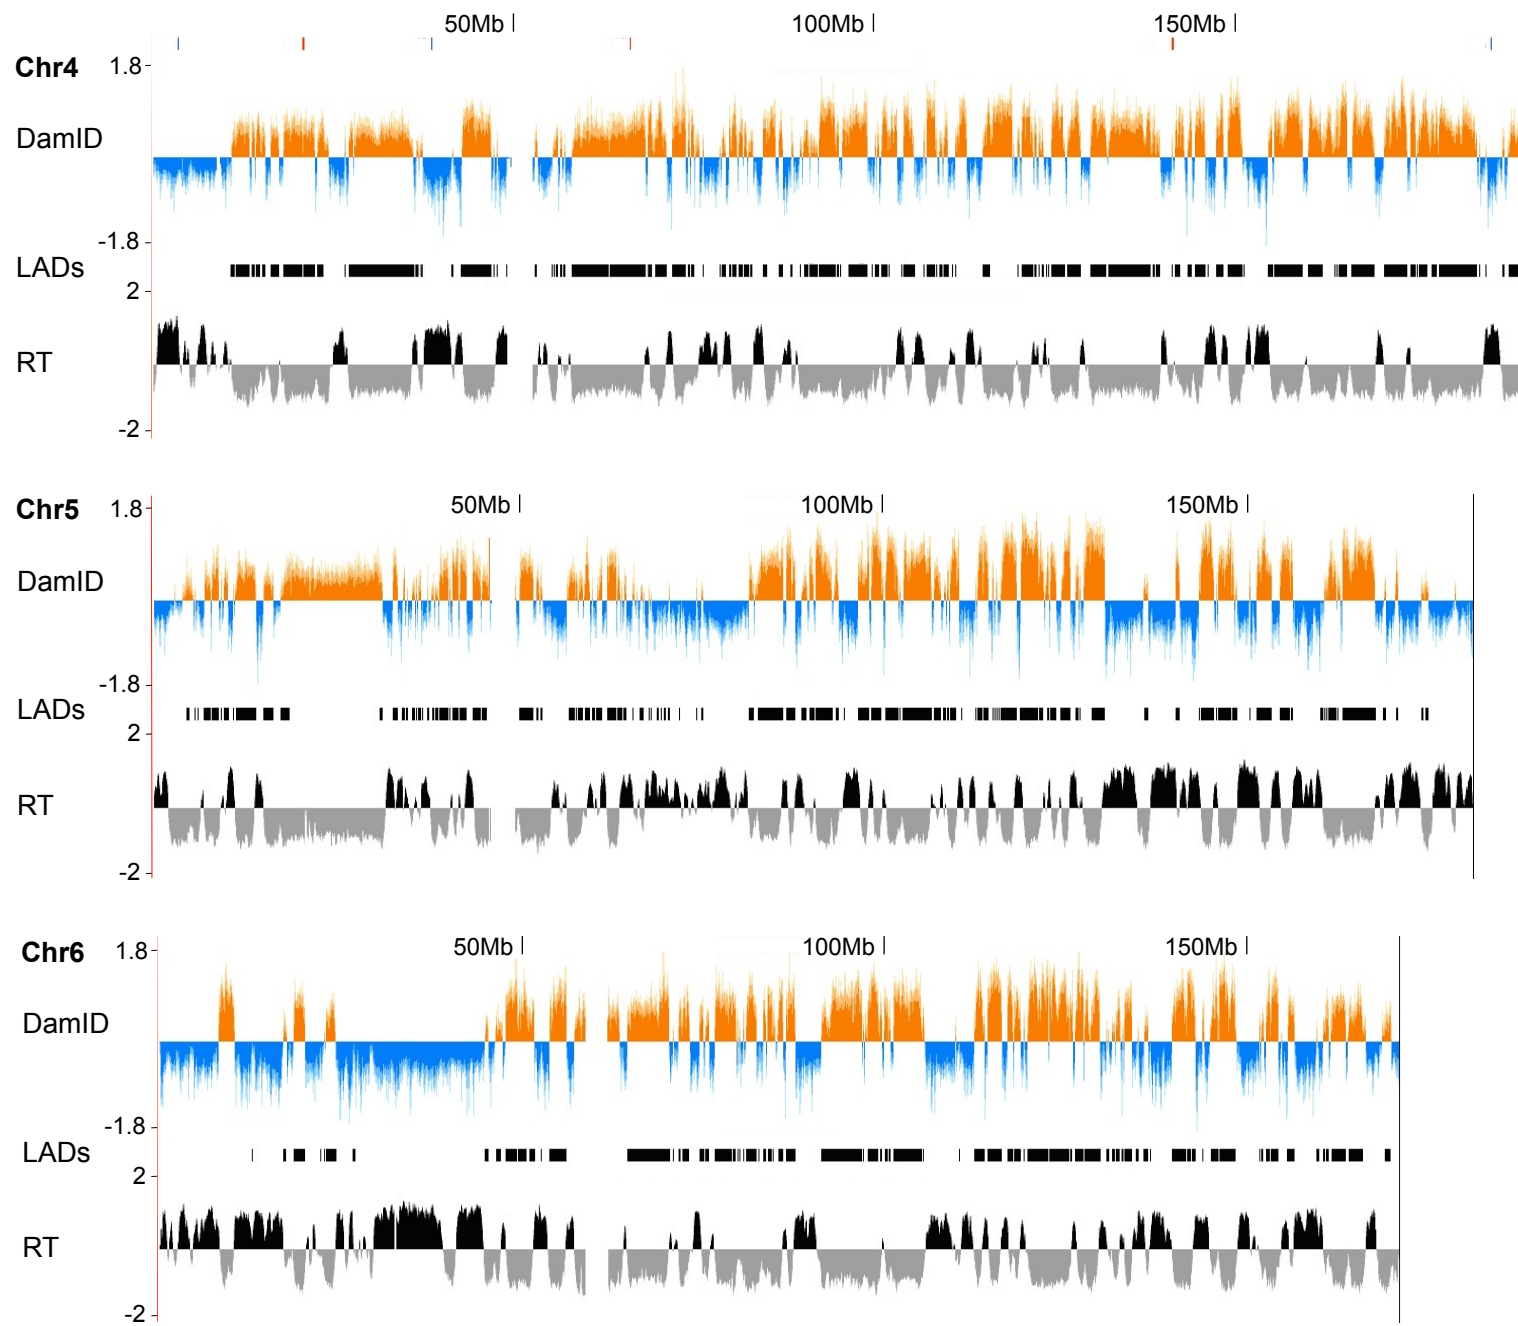

## Supplemental Figure 2

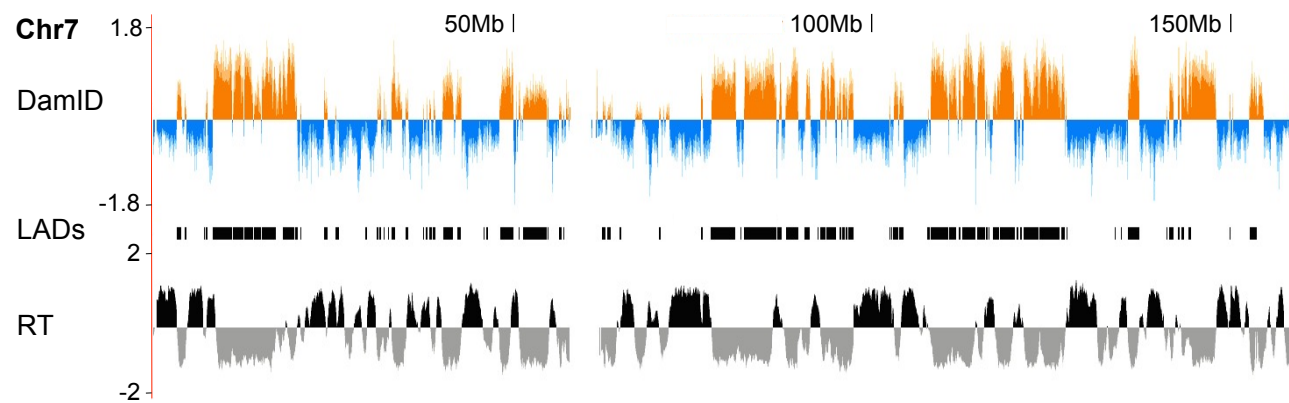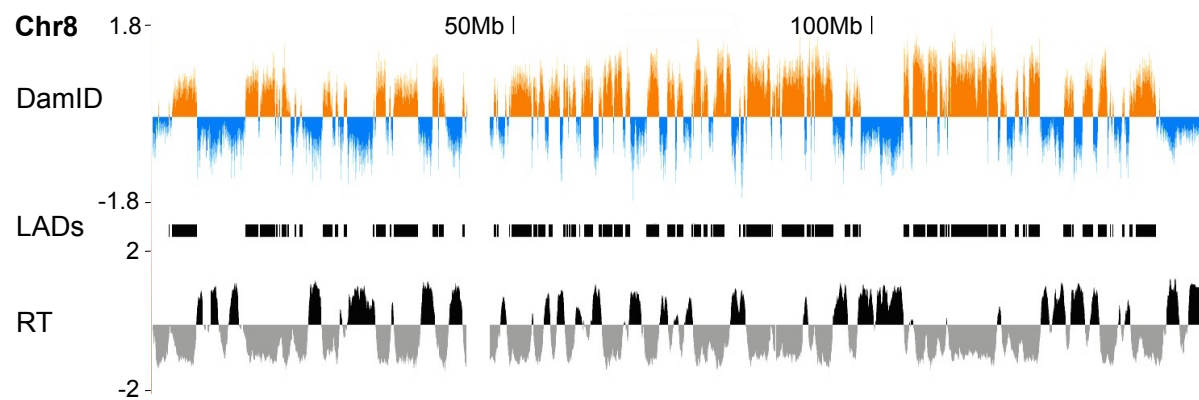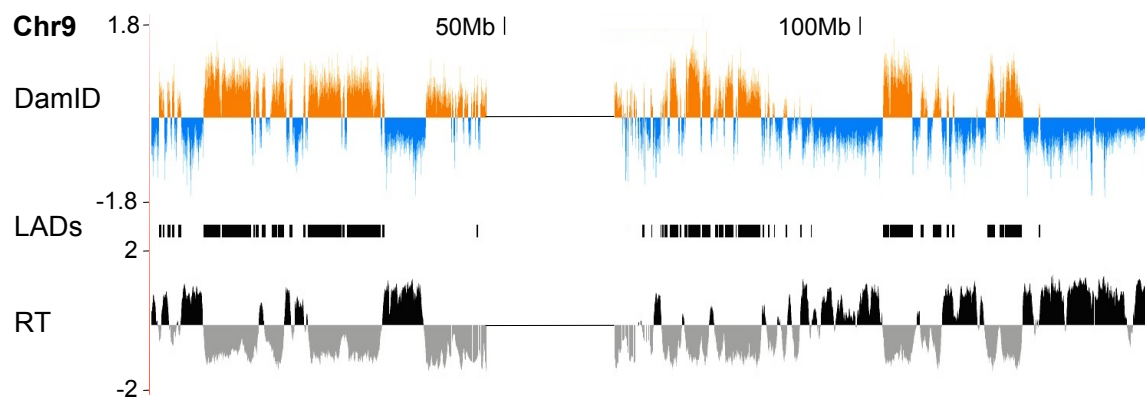

## Supplemental Figure 2

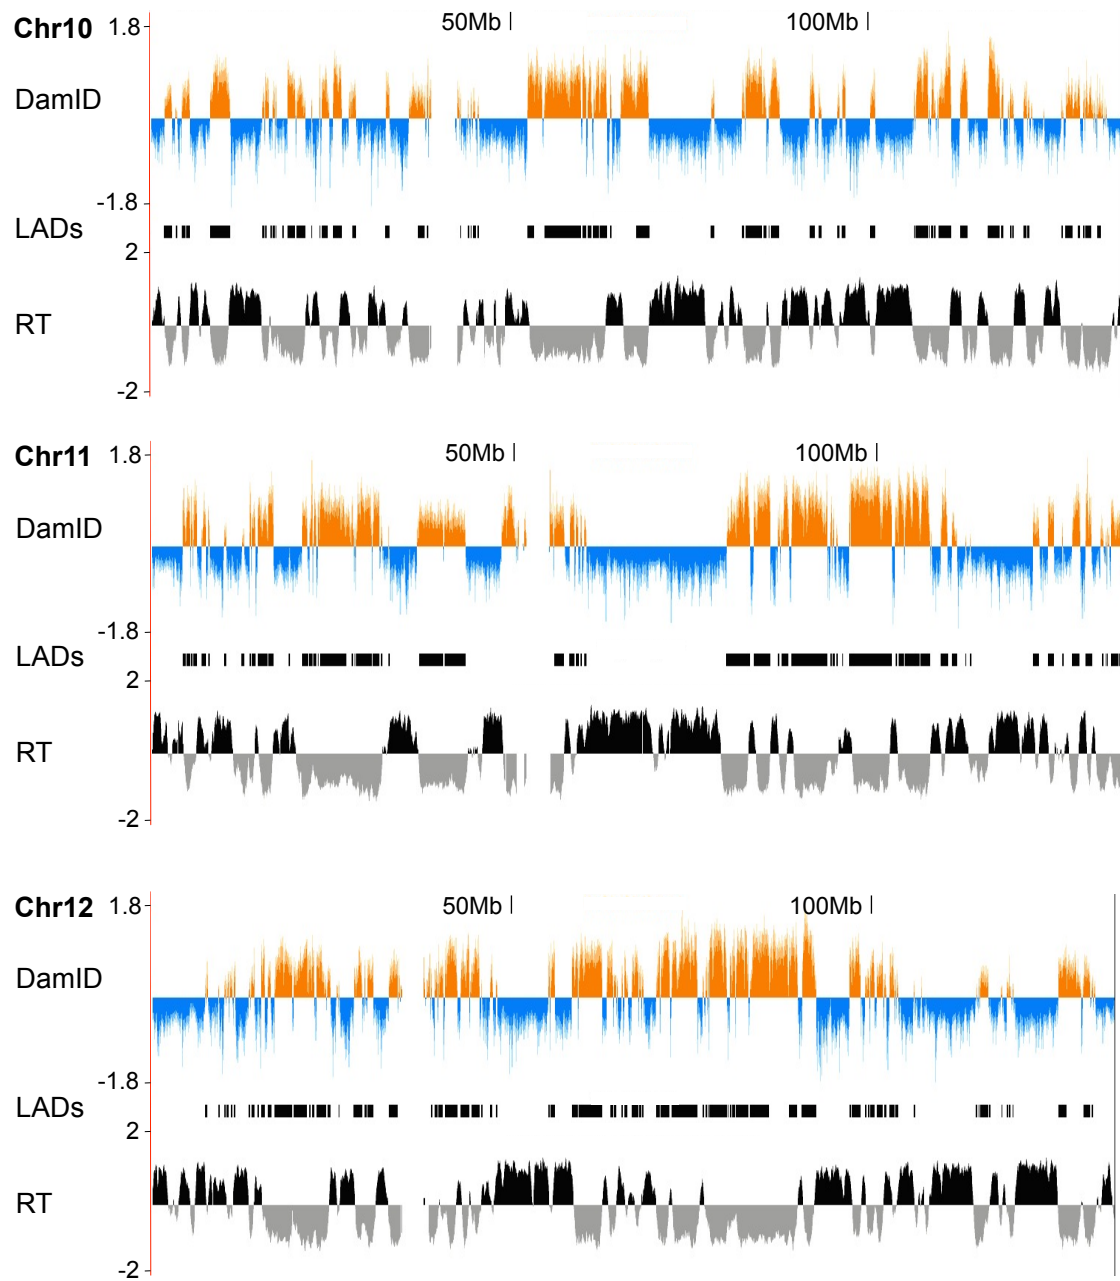

## Supplemental Figure 2

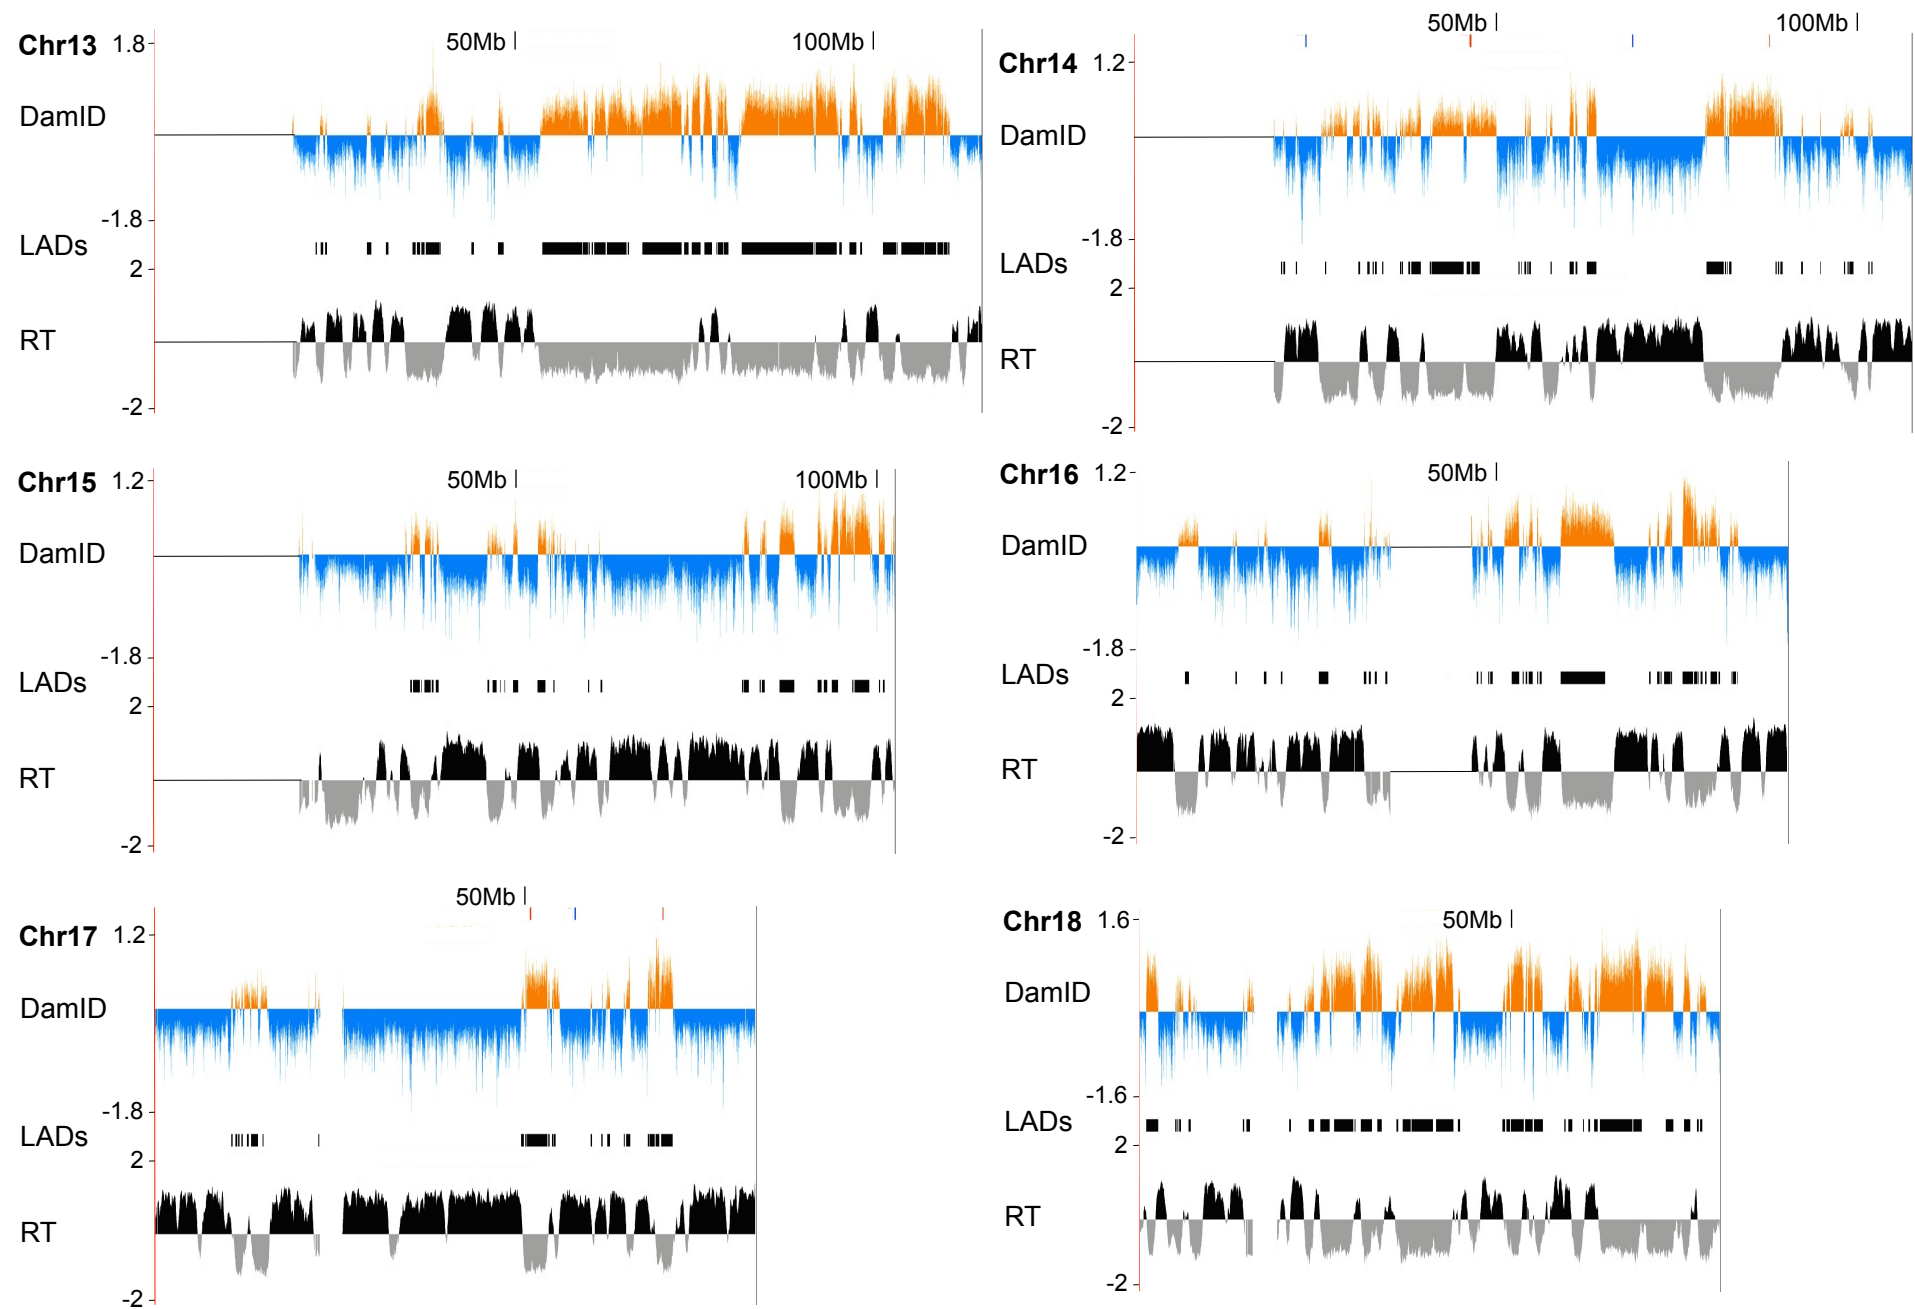

## Supplemental Figure 2

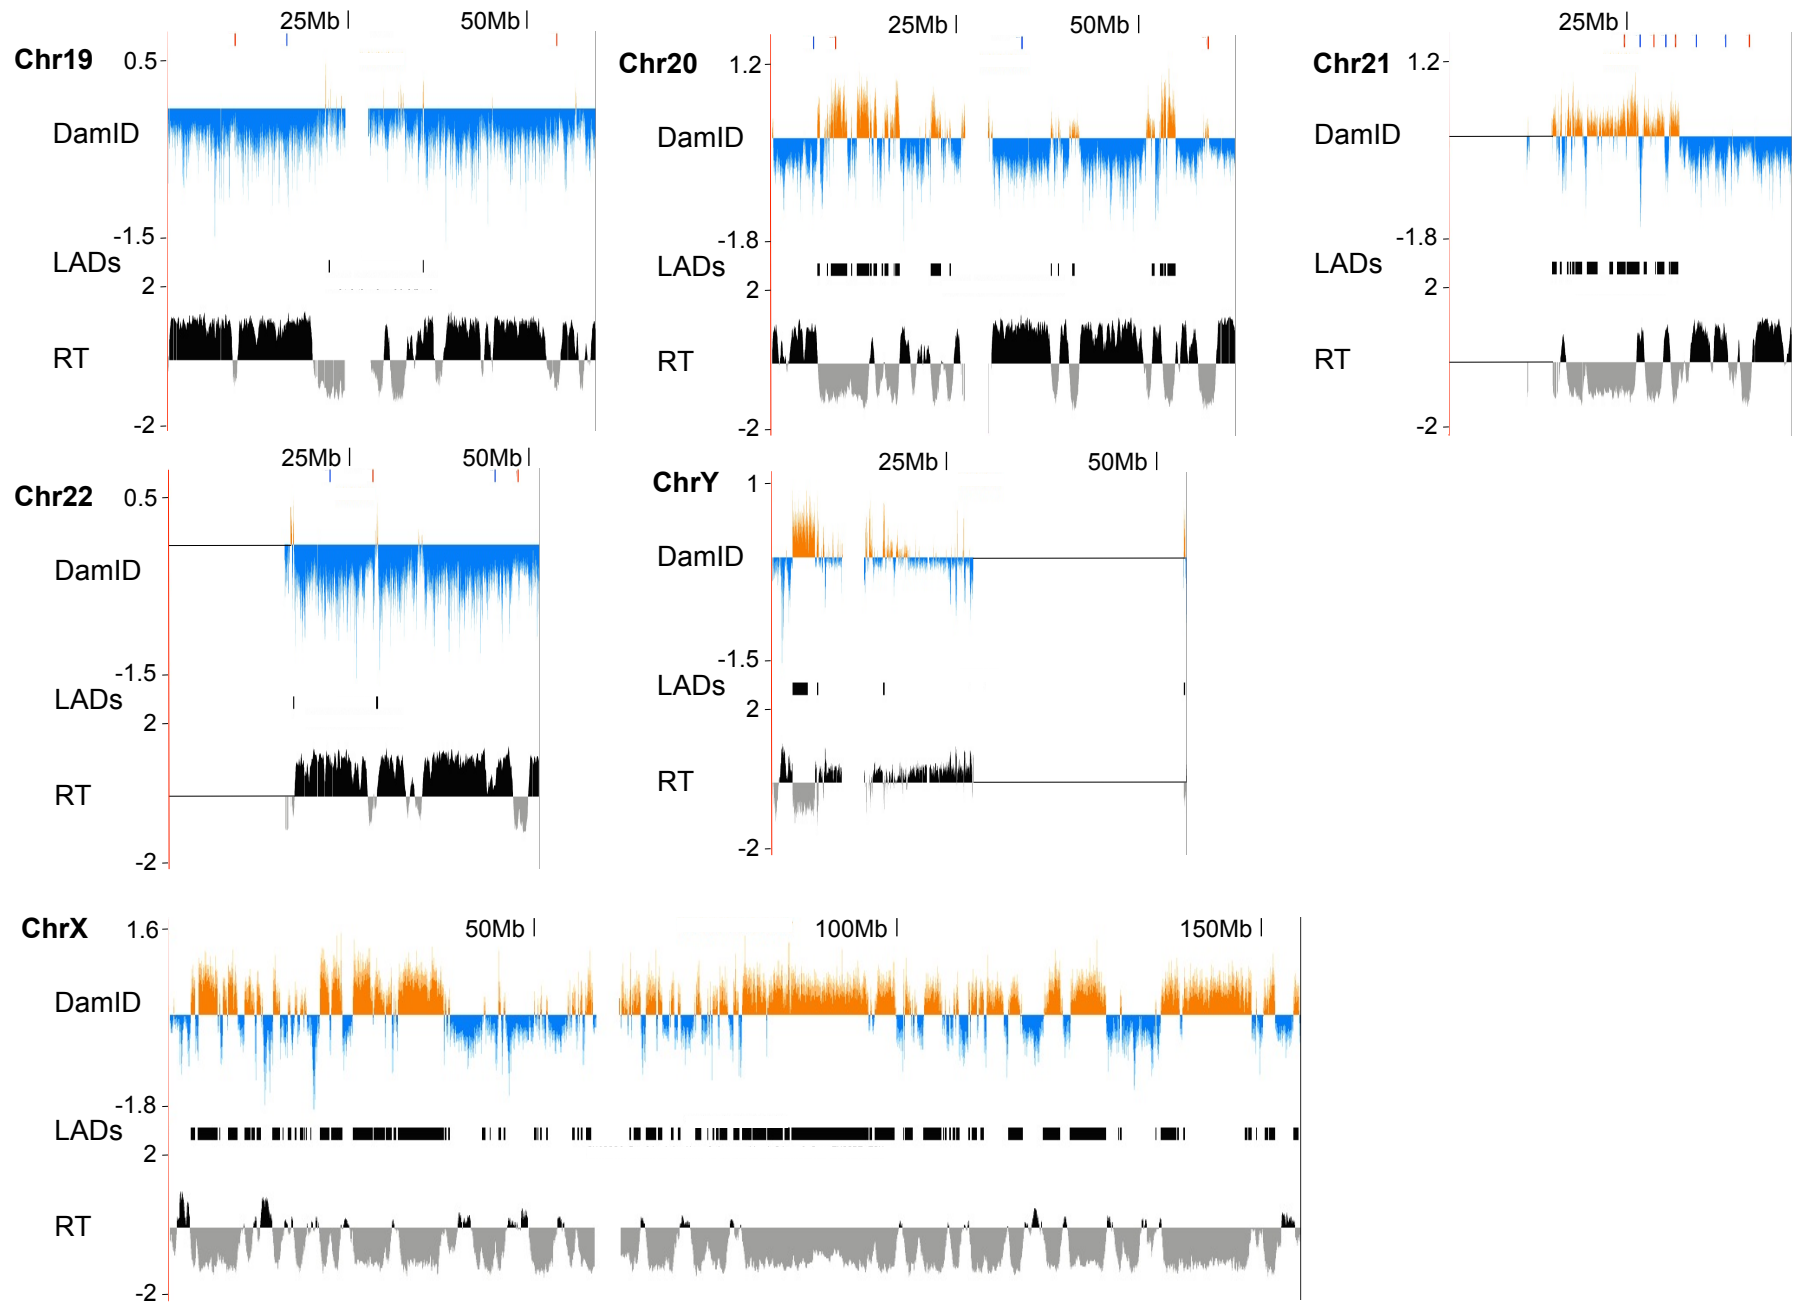

## Supplemental Figure 3

### Chromosome 3

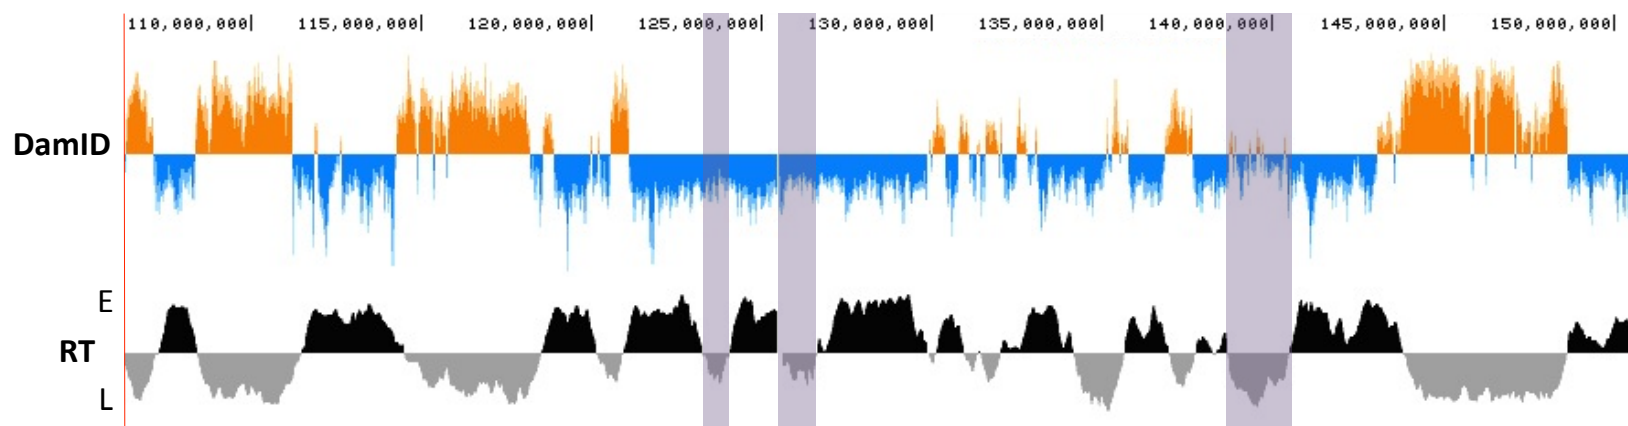

### Chromosome 1

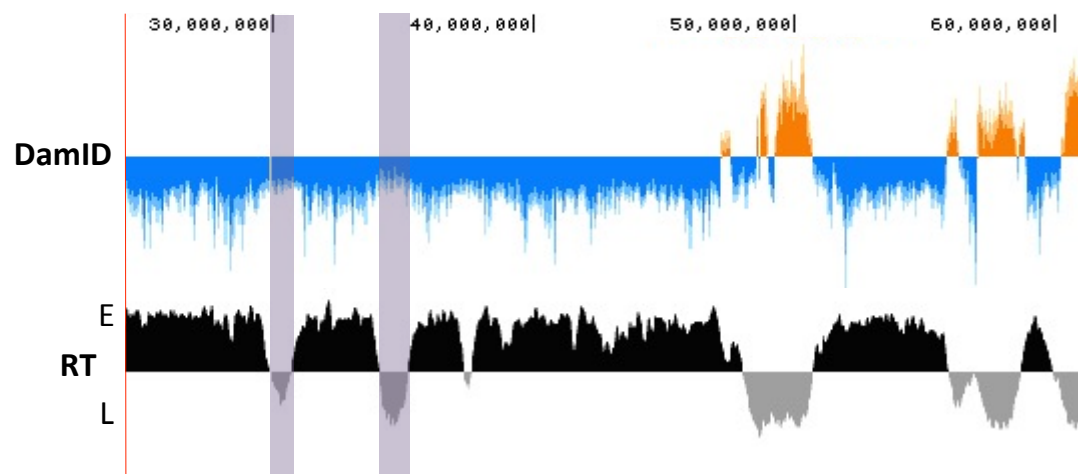



Supplemental Figure 4

Chromosome 3

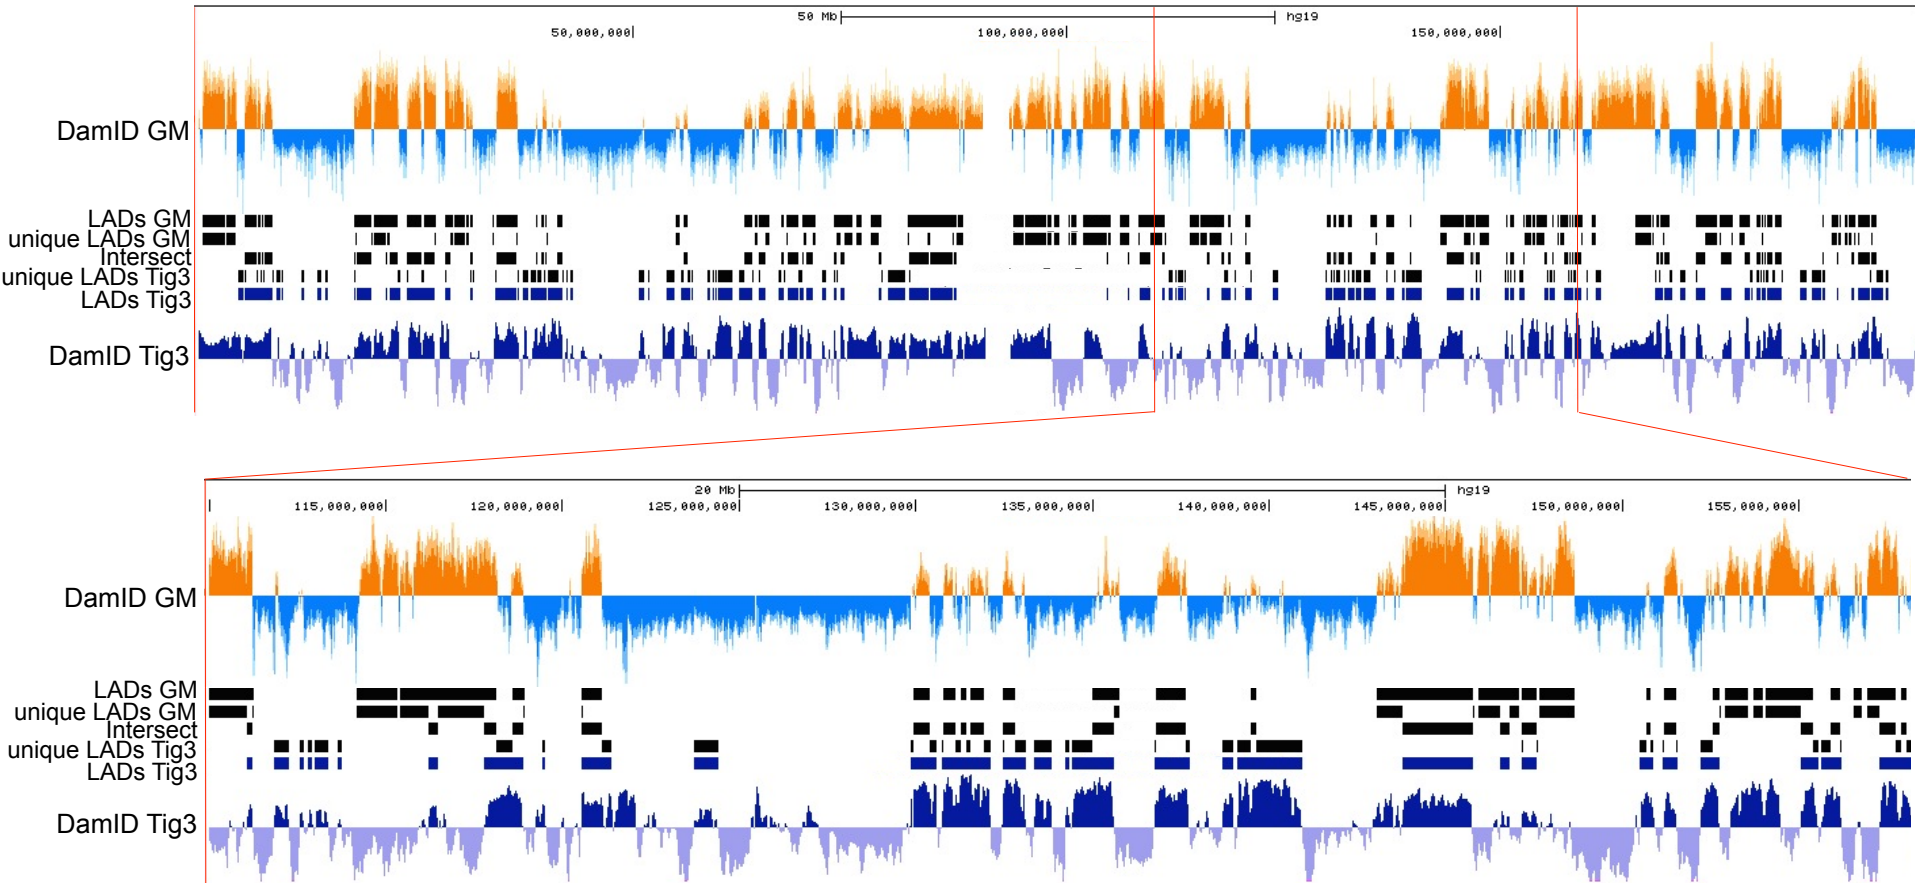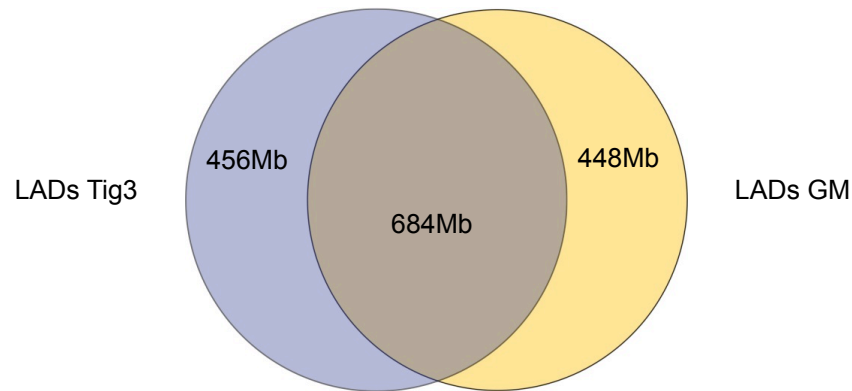

# Supplemental Figure 5

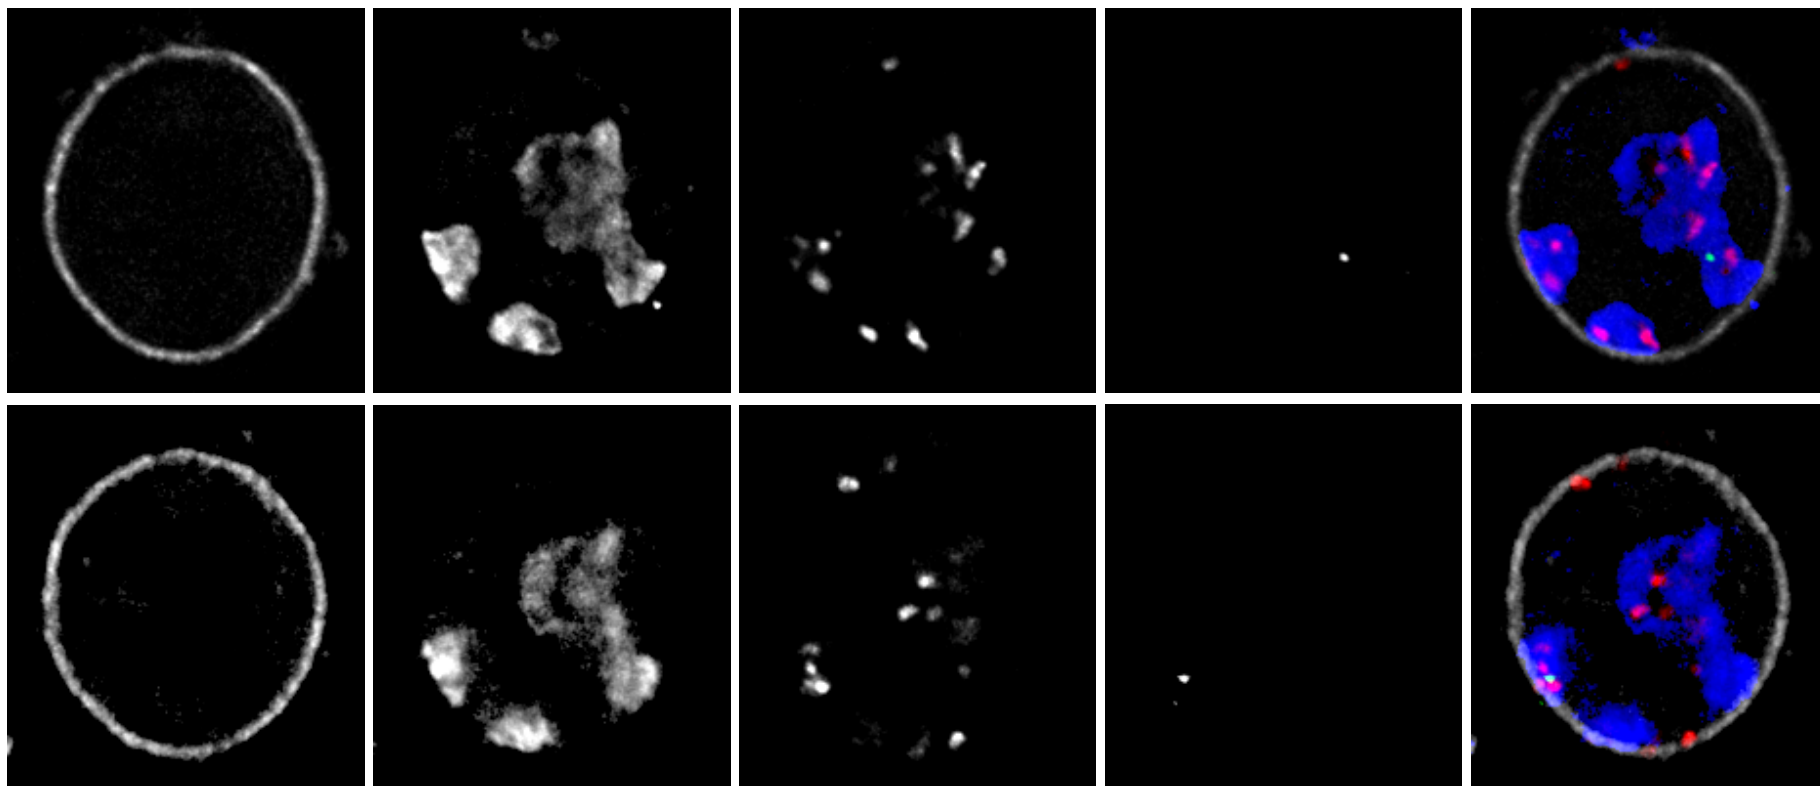

Lamina

Nucleolin

PCH

BAC

Lamina/Nucleolin/  
PCH/BAC

## Supplemental Figure 6

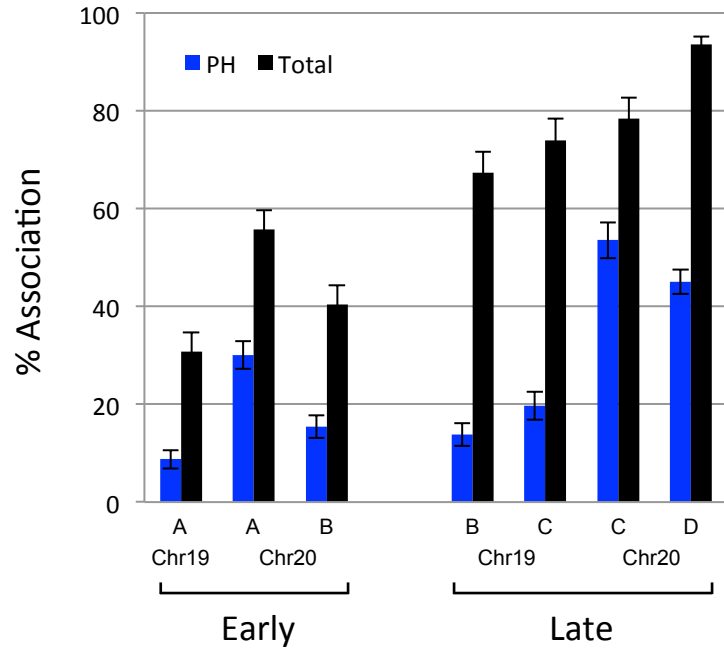

Supplemental Figure 7

200ng/ml actinomycinD

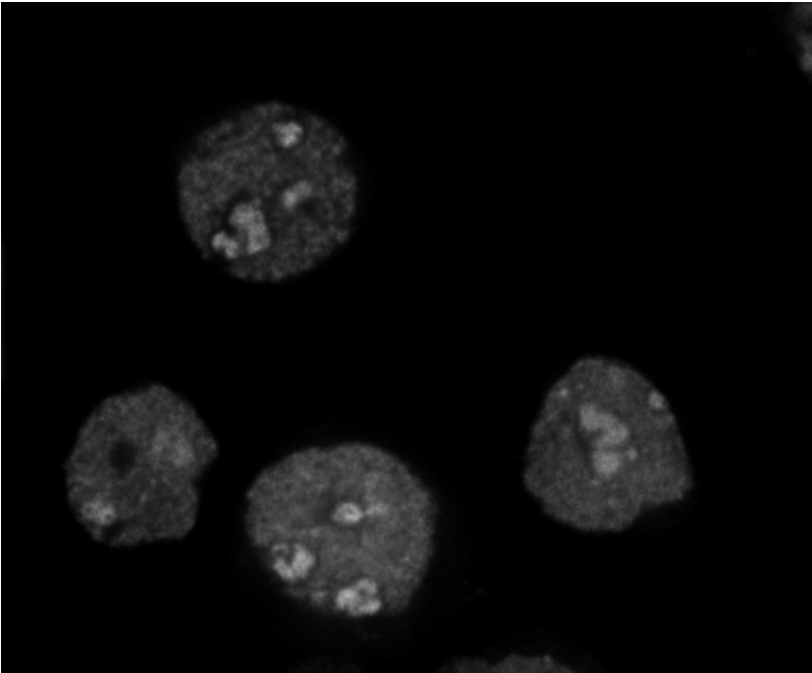

untreated

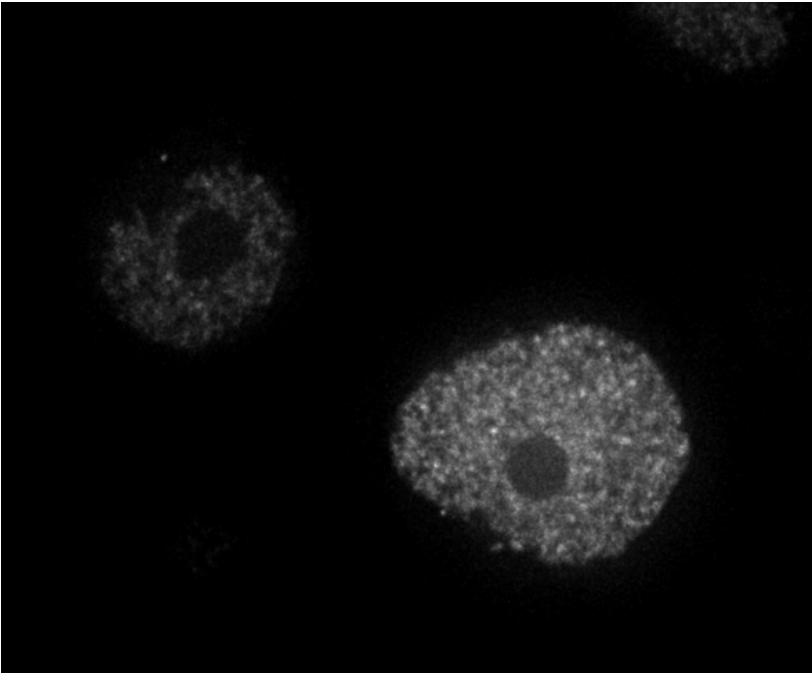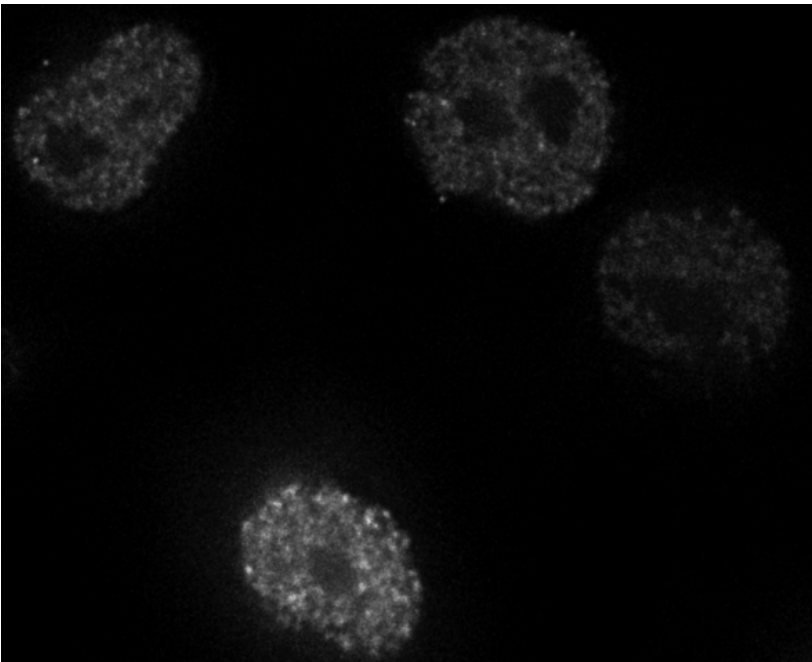

## Supplemental Figure 8

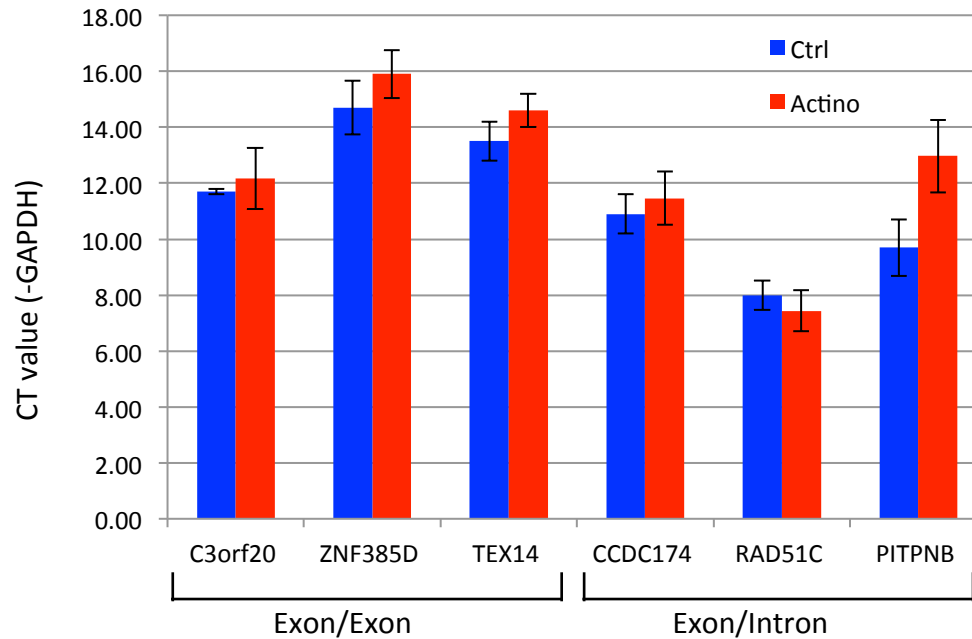

### Primers used for RT

C3orf20 F GGAGAAGCTGCAGGAGTTGT  
C3orf20 R CTGCAGTGGGAGGGTAATGT

Chr3 BAC RP11-119L4 @ 14.75Mb

CCDC174 F TTGCCAAACTTCGACAAAA  
CCDC174 R TTGGTGTCTTCCTCTCTCTG

Chr3 BAC RP11-119L4 @ 14.75Mb

Tex14 F AGCCTTCTCACAGCATCACA  
Tex14 R CAGTGCCTCCTCCATCACTT

Chr17 BAC RP11-142B17 @ 56.75Mb

ZNF385D F AAGACAGAGCTGCTGGGAAG  
ZNF385D R GCTGCAGCTGCTAGAGGATT

Chr3 BAC RP11-17C24 @ 21.58Mb

RAD51C F GGTTCAGACTGCTGAGGAA  
RAD51C R TTATGAAGCCCTGGGTATGC

Chr17 BAC RP11-142B17 @ 56.75Mb

PITPNB F GTCCCAGATGTGTGCCTAT  
PITPNB R TGTCTCCATCGTGAGATCG

Chr22 BAC RP11-79G21 @ 28.25Mb

## Supplemental Methods

### EU incorporation

5-Ethynyl uridine (EU) for incorporation into RNA was added to a final concentration of 1mM to untreated GM06990 cells and one hour following the addition of actinomycin D. After a one hour incubation the cells were harvested and deposited onto polylysine coated slides and fixed. The EU was labeled with Alexa-594 using the Click-iT® reaction according to manufacturer's instructions (Life Technologies; C10330).

### Nuclear RNA isolation and RT-PCR

GM nuclei were isolated by cell lysis in sucrose buffer and the detergent NP-40 on ice. Following centrifugation at 1,500g the nuclei pellet was washed in sucrose buffer without detergent and centrifuged again. Nuclear RNA was isolated using the TRIzol LS Reagent according to manufacturer's instructions (Life Technologies; 10296-028) and reverse transcription was performed on 100ng of DNase treated recovered RNA using random primers and SuperScript II (Life Technologies; 18064-014). qPCR was performed on an ABI 7900HT Real Time PCR machine and analyzed with SDS 2.4 software (Applied Biosystems/Life Technology) with SYBR Green incorporation to detect PCR products. The qPCR reactions were performed three times in triplicate, the CT values for the GAPDH control (which was invariant with actinomycin D treatment) were subtracted from those of the test ORFs.
